# Supplementary material for: Association between Peripheral Inflammatory Cytokines and Cognitive Function in Patients with First-Episode Schizophrenia
Source: MDPI journal article supplement (doi:10.3390/jpm12071137), 2022-07-14
Supplement: s1 [file s1]

Table S1. Comparisons of cytokine levels according to the type of antipsychotics and sex

|                                 | <b>TNF-<math>\alpha</math></b> | <b>IFN-<math>\gamma</math></b> | <b>IL-1<math>\beta</math></b> | <b>IL-6</b>    | <b>IL-8</b>    | <b>IL-10</b>     | <b>IL-12</b>  |
|---------------------------------|--------------------------------|--------------------------------|-------------------------------|----------------|----------------|------------------|---------------|
| <b>Type of antipsychotics</b>   |                                |                                |                               |                |                |                  |               |
| Amisulpride (n=50)              | 8.5 (7.4-10.8)                 | 23.4 (14.5-27.1)               | 2.3 (1.8-3.7)                 | 4.1 (2.4-5.8)  | 4.8 (3.2-11.9) | 14.6 (10.4-22.9) | 4.6 (3.7-6.9) |
| Aripiprazole (n=30)             | 7.7 (5.8-9.8)                  | 30.0 (24.3-36.2)               | 3.1 (2.1-3.7)                 | 5.2 (3.4-9.6)  | 5.3 (3.6-21.0) | 19.4 (14.1-26.6) | 6.1 (4.3-8.3) |
| Paliperidone/risperidone (n=71) | 7.9 (6.6-9.8)                  | 23.1 (15.7-30.4)               | 2.4 (1.6-3.7)                 | 3.8 (2.0-5.4)  | 5.4 (3.8-10.1) | 13.7 (7.7-20.5)  | 4.4 (2.8-6.4) |
| Quetiapine (n=13)               | 9.2 (6.6-10.4)                 | 24.6 (20.6-37.2)               | 2.6 (2.2-4.4)                 | 5.2 (2.7-10.8) | 6.6 (4.7-10.2) | 14.7 (8.4-24.3)  | 5.1 (4.0-7.4) |
| Others (n=5)                    | 10.0 (6.1-12.4)                | 26.8 (14.3-40.2)               | 2.9 (1.3-3.9)                 | 2.7 (2.1-4.8)  | 8.7 (5.4-11.9) | 14.8 (10.5-25.9) | 5.6 (3.1-6.7) |
| None (n=5)                      | 10.4 (7.1-13.6)                | 17.4 (9.9-47.0)                | 1.7 (0.9-4.4)                 | 3.2 (1.5-5.9)  | 4.7 (3.8-6.3)  | 10.8 (4.5-23.2)  | 3.9 (2.5-7.2) |
| <i>p-value</i>                  | 0.240                          | 0.057                          | 0.290                         | 0.116          | 0.736          | 0.144            | 0.130         |
| <b>Sex</b>                      |                                |                                |                               |                |                |                  |               |
| Female (n=96)                   | 8.4 (6.5-10.7)                 | 25.9 (21.1-34.5)               | 3.0 (2.0-3.8)                 | 4.3 (2.5-6.3)  | 5.2 (3.7-9.1)  | 16.7 (9.9-24.9)  | 5.4 (4.1-7.4) |
| Male (n=78)                     | 8.4 (6.9-10.2)                 | 22.0 (13.2-27.7)               | 2.2 (1.7-3.4)                 | 3.6 (2.1-5.7)  | 5.4 (3.8-12.7) | 13.6 (9.3-20.4)  | 4.3 (2.9-6.0) |
| <i>p-value</i>                  | 0.888                          | 0.001                          | 0.014                         | 0.255          | 0.594          | 0.072            | 0.001         |

TNF- $\alpha$ , tumor necrosis factor-alpha; IFN- $\gamma$ , interferon-gamma; IL, interleukin
